# Supplementary material
Source: PubMed Central journal article supplement (PMC8236318)

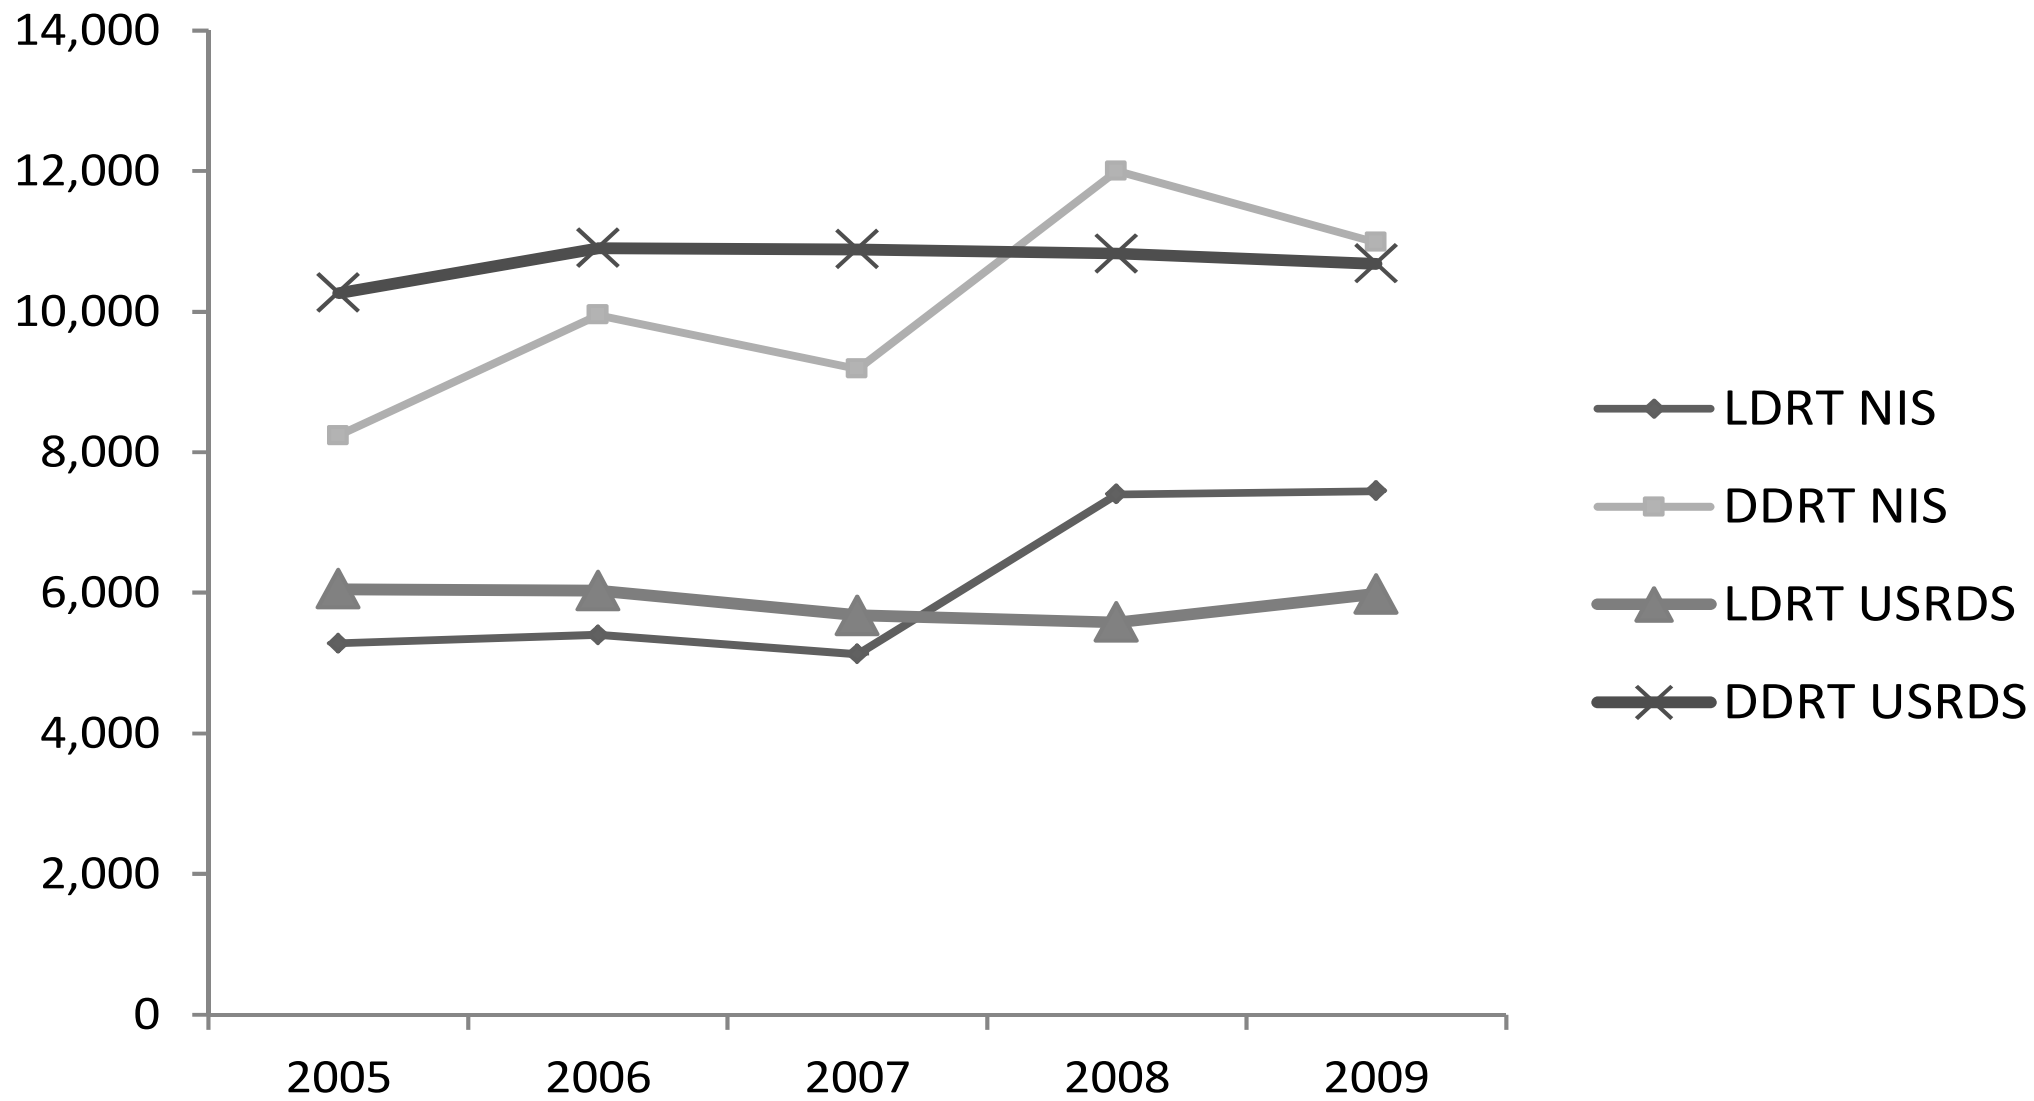

Supplement: NIHMS723623-supplement-2.pdf [file NIHMS723623-supplement-2.pdf]

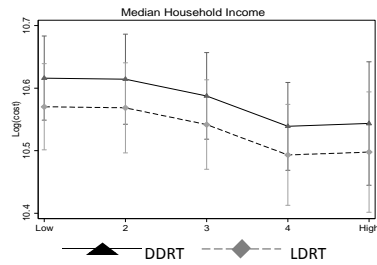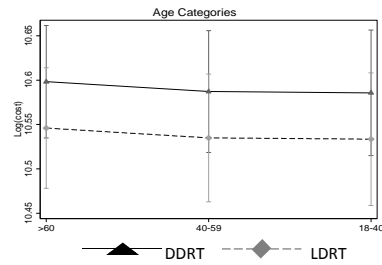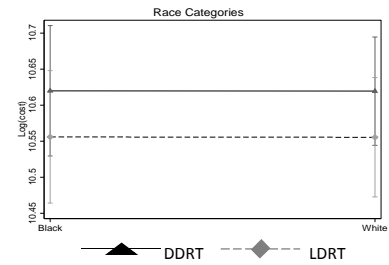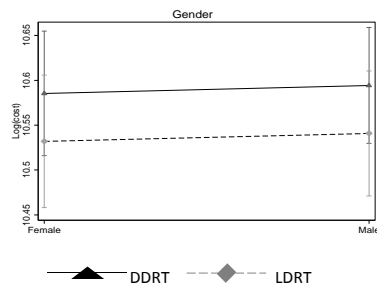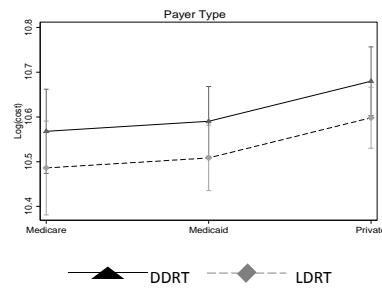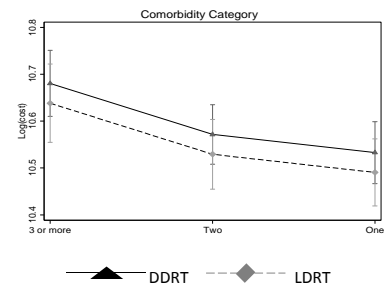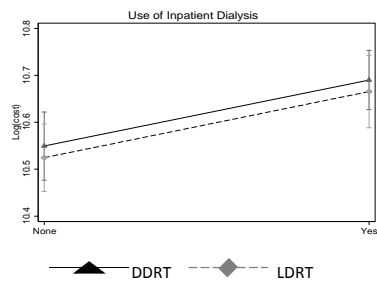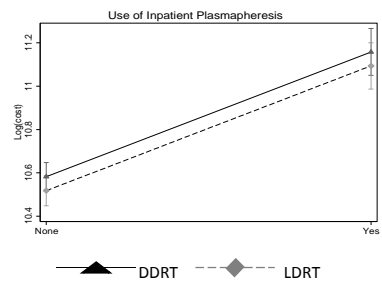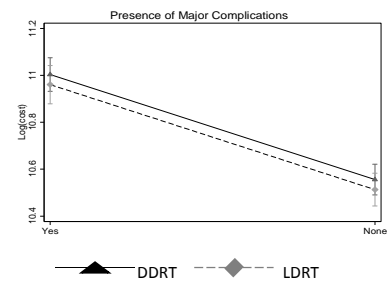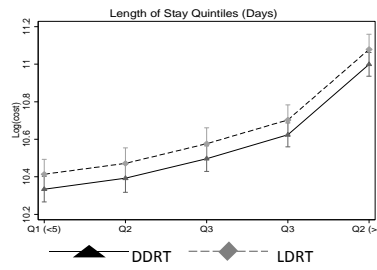

Supplement: NIHMS723623-supplement-3.pdf [file NIHMS723623-supplement-3.pdf]

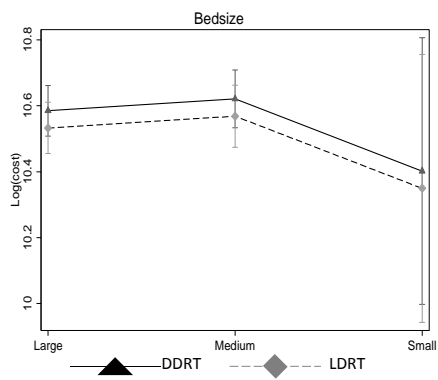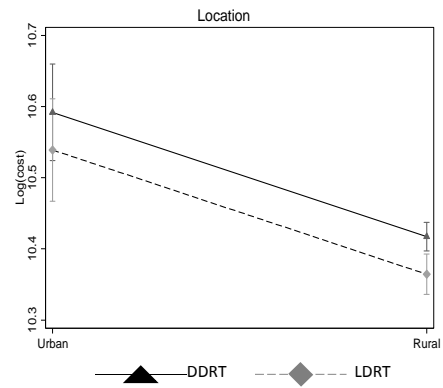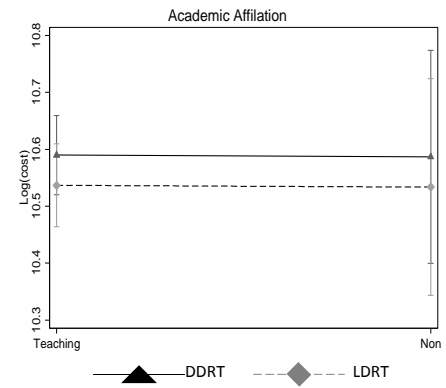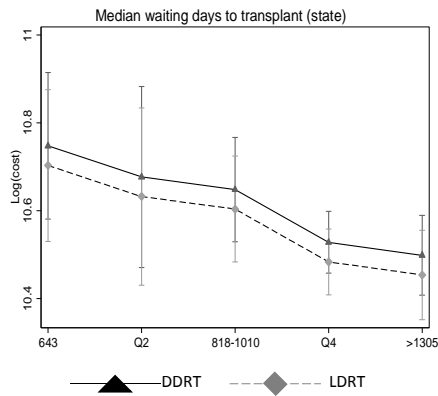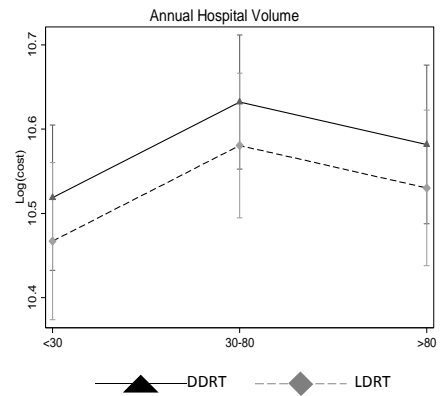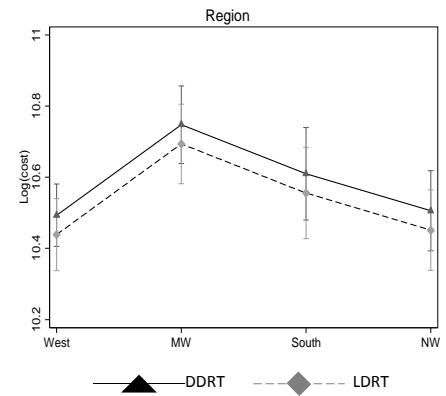

Supplement: NIHMS723623-supplement-4.pdf [file NIHMS723623-supplement-4.pdf]
